# Supplementary material for: Biodistribution of upconversion/magnetic silica-coated NaGdF4:Yb3+/Er3+nanoparticles in mouse models
Source: Royal Society of Chemistry journal article supplement (doi:10.1039/c7ra08712h), 2017-01-01
Supplement: c7ra08712h1.pdf [file c7ra08712h1.pdf]

### Electronic Supplementary Information

Table S1.  $T_1$  relaxometry of  $\text{NaGdF}_4\text{:Yb}^{3+}/\text{Er}^{3+}$  nanoparticles.

| Concentration (mg/ml) | Relaxation time (ms) |
|-----------------------|----------------------|
| 5                     | 63±1                 |
| 2.5                   | 170±5                |
| 1.25                  | 302±5                |
| 0.625                 | 503±1                |
| 0                     | 2750±141             |

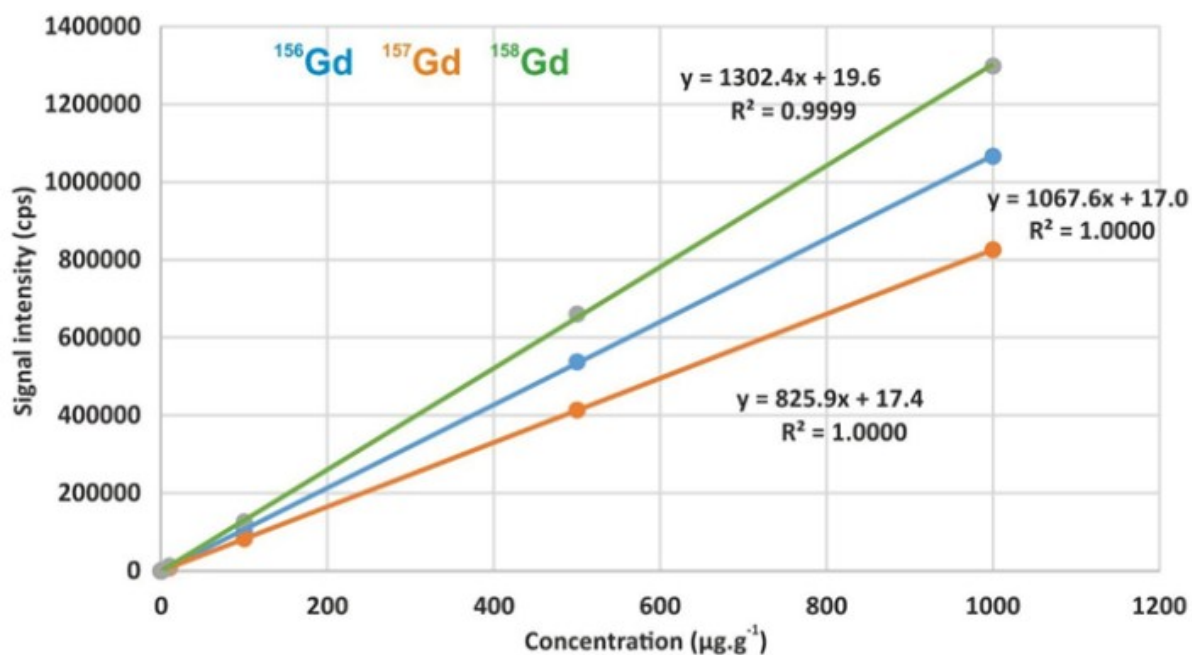

Fig. S1. Gadolinium calibration curves obtained using LA-ICP MS with a 110  $\mu\text{m}$  laser focus.

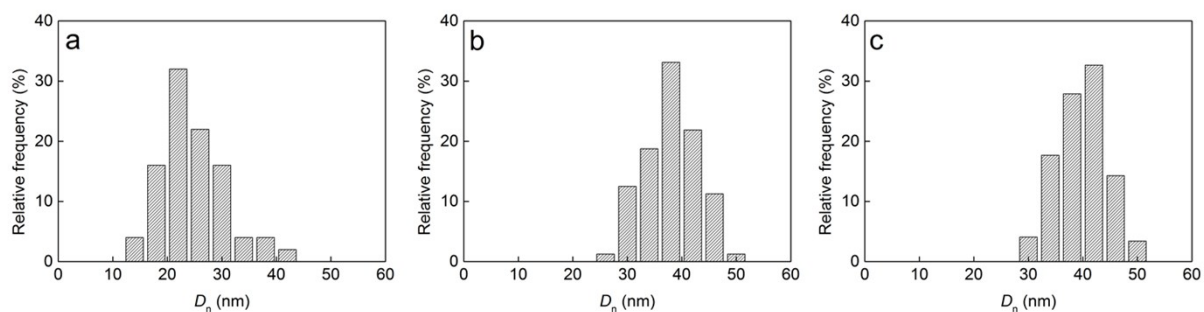

Fig. S2. Size distribution histograms of (a) starting  $\text{NaGdF}_4\text{:Yb}^{3+}/\text{Er}^{3+}$  and (b, c)  $\text{NaGdF}_4\text{:Yb}^{3+}/\text{Er}^{3+}@\text{SiO}_2$  nanoparticles; (b) 20  $\mu\text{l}$  and (c) 40  $\mu\text{l}$  TMOS in the feed; number-average diameter ( $D_n$ ) of the individual particles was determined by image analysis of TEM micrographs.
